# Supplementary material
Source: PubMed Central journal article supplement (PMC5302053)

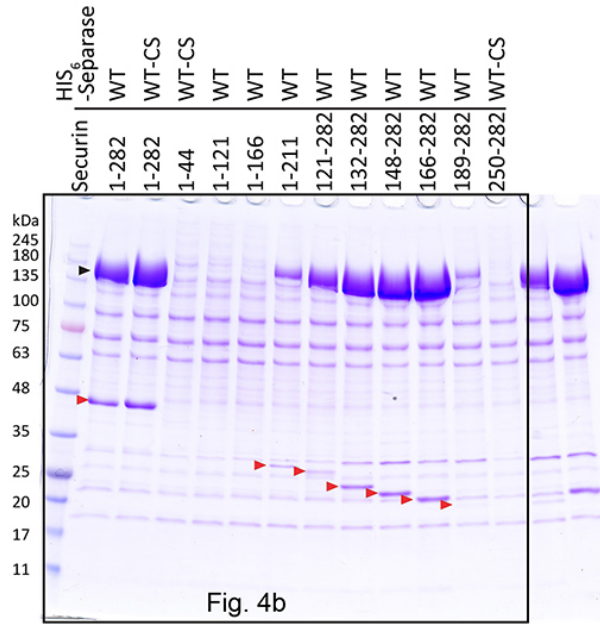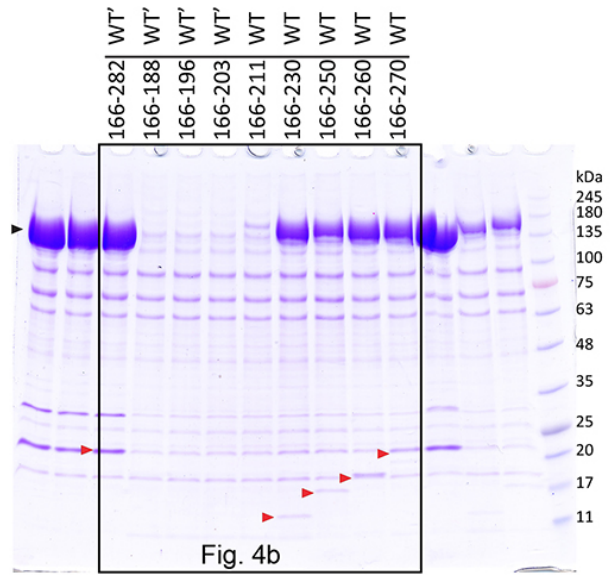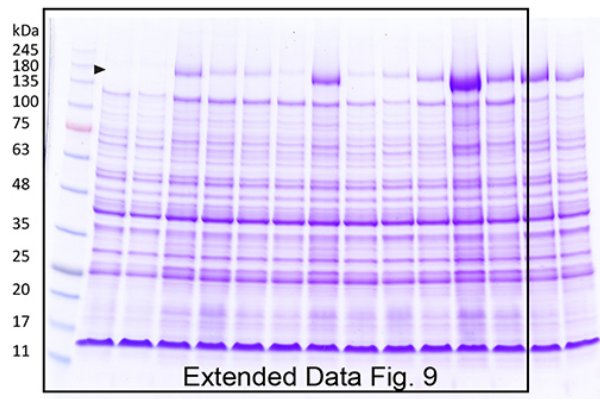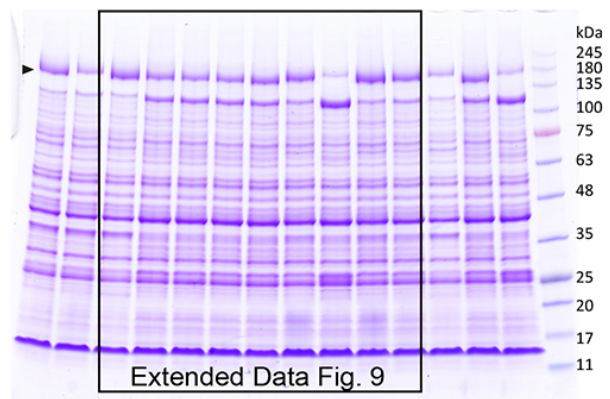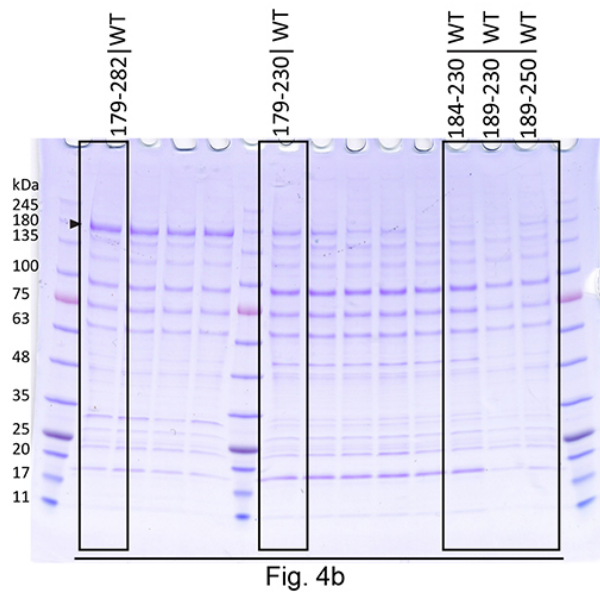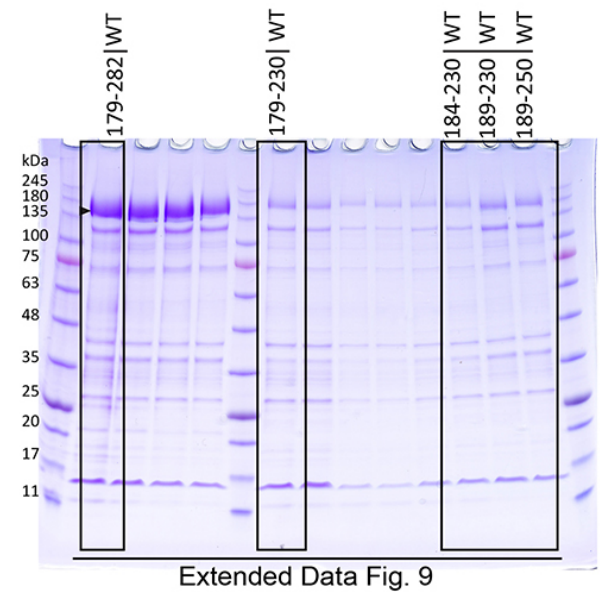

Supplement: NIHMS836816-supplement-supp_info.pdf [file NIHMS836816-supplement-supp_info.pdf]
